# Supplementary material for: Transcriptional networks are associated with resistance to Mycobacterium tuberculosis infection
Source: PubMed Central journal article supplement (PMC5393882; doi:10.1371/journal.pone.0175844), 2017-04-17
Supplement: pone.0175844.s002.pdf [file pone.0175844.s002.pdf]

# TSTNEG

# TSTPOS

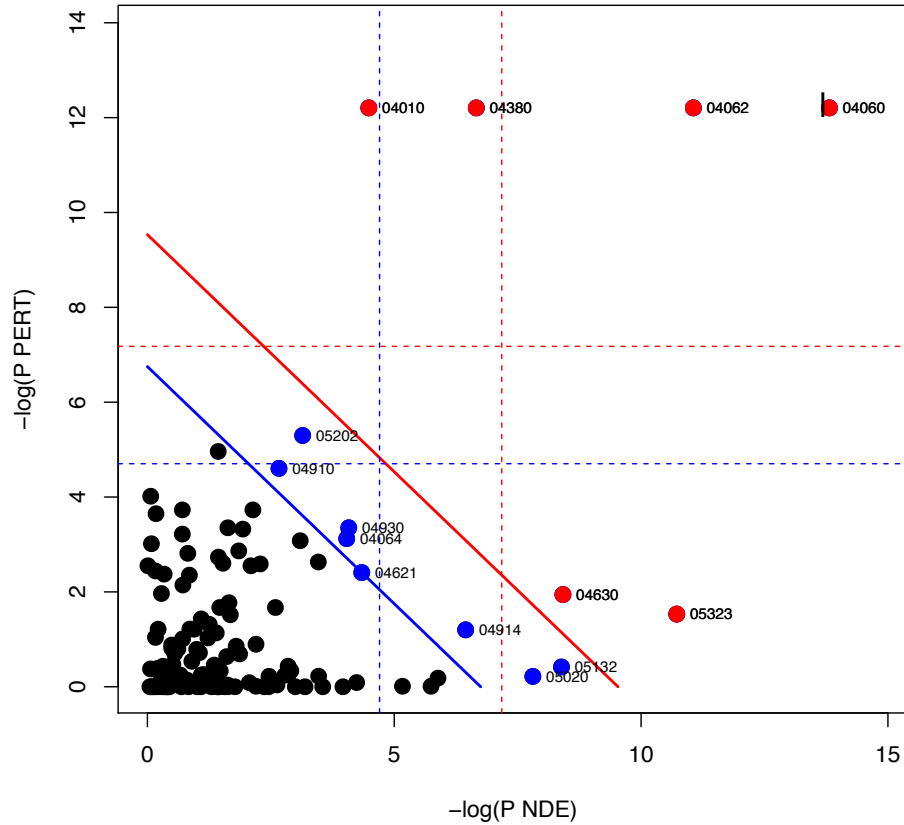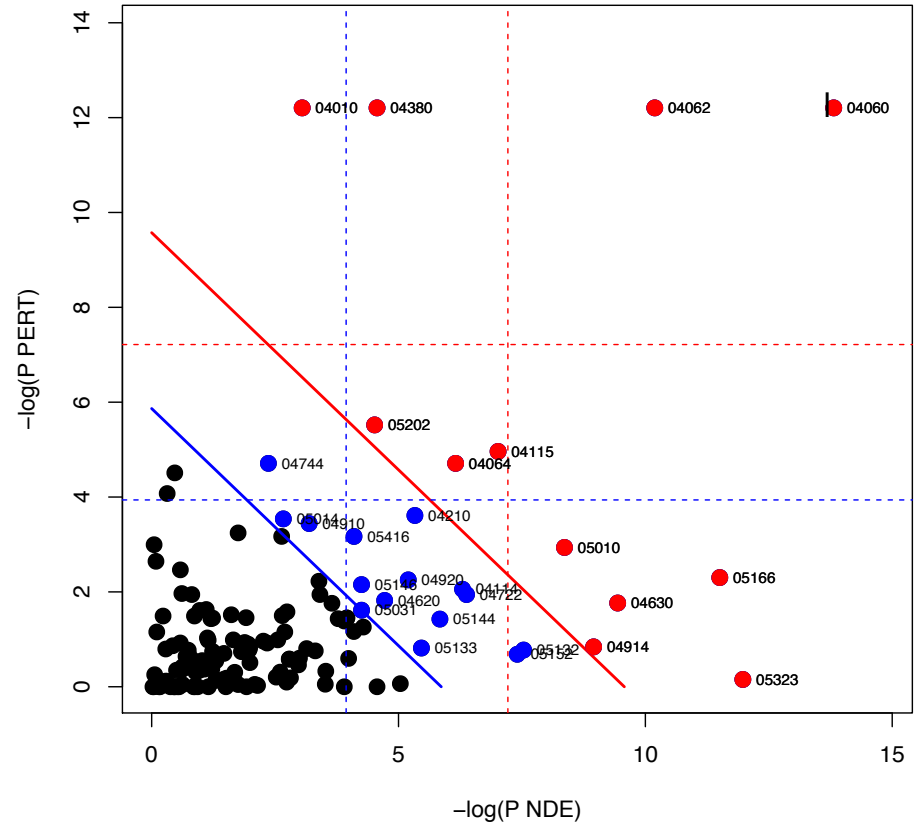

**S2 Figure. Results of Signaling Pathway Interaction Analysis (SPIA).** TSTNEG and TSTPOS samples were analyzed independently by SPIA. Within the TSTPOS data there are twelve KEGG pathways that meet pre-defined criteria for significant perturbation. Six of these pathways are also significant in TSTNEG data. KEGG pathways are indicated by their numbers. Instead of their names. P NDE reflects the probability that the number of differentially expressed genes is over-represented in a given pathway. P PERT reflects the amount of perturbation that is measured in each pathway and accounts for topology or hierarchy of biological networks.
