# Supplementary material for: Transcriptional networks are associated with resistance to Mycobacterium tuberculosis infection
Source: PubMed Central journal article supplement (PMC5393882; doi:10.1371/journal.pone.0175844), 2017-04-17
Supplement: pone.0175844.s003.pdf [file pone.0175844.s003.pdf]

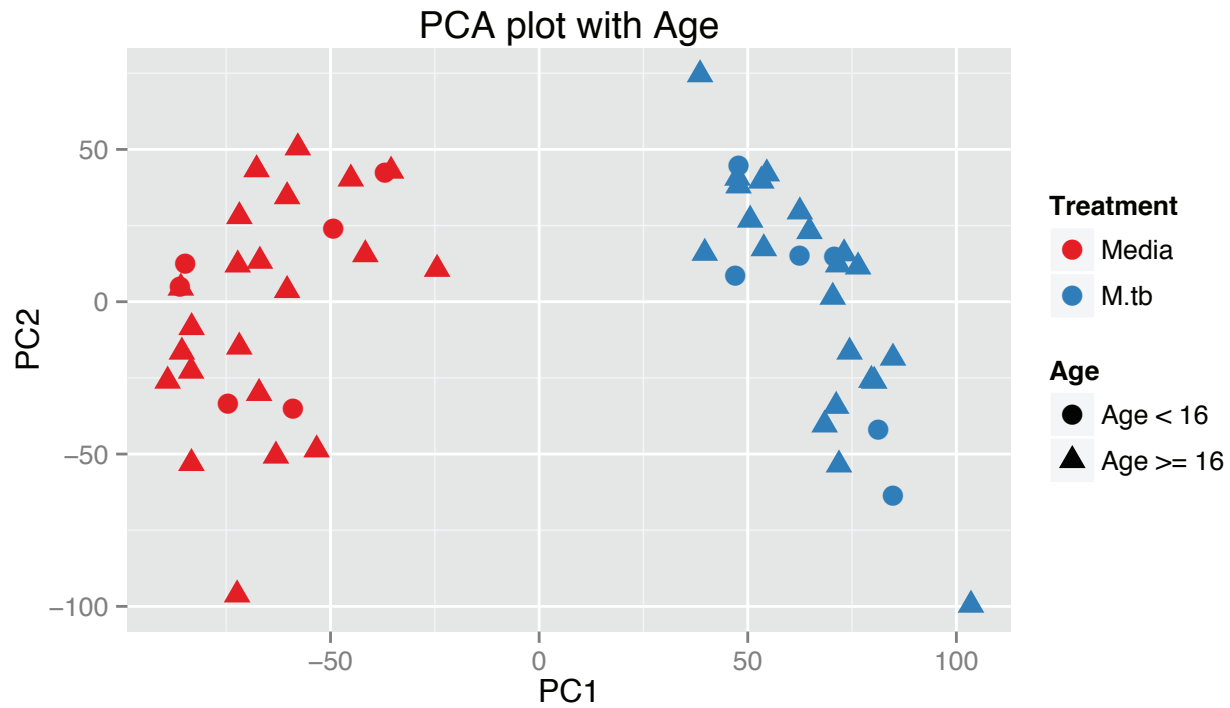

**Supplementary Figure 3. Principal Components Plot stratified by Age and Treatment.** The data shown in Figure 1B of the main text was re-labelled using age instead of TST status. Samples arising from 6 study subjects under the age of 16 are evenly distributed among those greater than 16 years of age
